# Supplementary material for: Untangling the association between prostate-specific antigen and diabetes: a systematic review and meta-analysis
Source: publisher site journal article supplement (doi:10.1515/cclm-2020-0145), 2020-07-20
Supplement: Supplementary file 1 [file j_cclm-2020-0145_suppl_002.doc]

**Supplementary Table S2**: Detailed characteristics of studies evaluating PSA levels in diabetics versus non-diabetics.

| **Reference** | **Diabetes/PSA levels relationship (crude analysis)** | **Diabetes/PSA levels relationship (adjust/stratified analysis)** | **Types of diabetes** | **Prostate volume** | **Duration of diabetes** | **Severity of diabetes** | **Other results: biomarkers of glycemic control/PSA levels** | **Limitations** | **Conclusions** |
| --- | --- | --- | --- | --- | --- | --- | --- | --- | --- |
| Kobayashi M, et al., 2019.(1) | Significant inverse difference | Diabetes remained as predictors of PSA level (coefficient: -0.0676 p-value=0.009) when incorporated into the multiple regression model together with age, BMI, FBG and ALT. | Not differentiated | Not considered | Not available | Not considered | Men with high (6.0–6.9%) and very high (≥ 7.0%) HbA1c  had significant decreases (− 6.6% and − 12.6%, respectively) in the predicted geometric mean PSA levels for men aged 52 years compared with those with normal HbA1c**.** | 1. PCa and benign prostatic hyperplasia, which could bias PSA values, were not fully excluded by prostatic biopsy and measurement of prostatic volume, respectively.  2. They could not have precise data about diabetic condition including the type of diabetes (I or II), period of disease, and type of treatment (insulin or anti-diabetic pills) and its duration, which might also affect PSA values. | The PSA level was significantly influenced by BMI, presence of diabetes, FBG, HbA1c, and ALT levels after adjusting age. |
| Ainahi A, et al., 2018(2) | Not differences | PSA levels significantly lower in diabetics for males aged between 50 and 59 y. | Not differentiated | Not considered | Not considered | Not considered | No correlations between serum PSA level and HbA1c (R2= 0.009, P=0.065) and FBG (R2=0.0001, P=0.8537) were observed in diabetic sample. | Lack of clinical data (BMI, obesity and medications). | PSA levels are age-dependant in diabetic and non-diabetic but the PSA levels are affected by diabetes status only in the group aged between 50-59 years. |
| Al-Asadi JN, et al., 2017(3) | Significant inverse difference | Stratified analysis by BMI (<25; 25-29.9 and ≥30) and insulin treatment showed significant inverse differences in diabetics. | Type 2 diabetes | Not available | Stratified analysis by duration (< 5 y; 5-10 y and >10 y) showed significant inverse differences. | Analysis by HbA1C level showed significant inverse differences. | HbA1c showed significant association with serum PSA level.  PSA (ng/ml), mean (sd):  HbA1c <7%: 2.51 (0.99)  HbA1c ≥7%: 1.30 (0.65) p<0.001 | 1. Small sample size.  2. Duration of treatment, dosage of medications and level of adherence to treatment were not examined. | Serum PSA level is significantly lower and less age dependent in T2DM patients than in non‑diabetics. Therefore, DM should be considered in setting of PSA threshold when screening for PCa. |
| Park JS, et al., 2017(4) | Not differences | Not reported | Not differentiated | Not considered | Not considered | Not considered | Not considered | 1. The study endpoint was confined to serum PSA level, which is an imprecise proxy for PCa risk.  2. The association between metformin use and diagnosis of PCa was not evaluated. | They observed no difference in PSA levels between patients with and without diabetes |
| Sun A, et al., 2015(5) | Not differences | - Not differences (age-matched)  - Significantly higher in prediabetics compared to T2DM and normoglucemics (age-matched) | Type 2 diabetes | Not considered | Not considered | Not considered | Pearson’s correlation analysis revealed that:   1. Age (r=0.251, p=0.006), FPG (r=0.229, p=0.012), HbA1c (r=0.278, p=0.002), TC (r=0.196, p=0.032), LDL (r=0.246, p=0.007) and preDM (r=0.400, p<0.001) 2. Age (r=0.137, p=0.026), FPG (r=-0.075, p=0.017), HbA1c (r=-0.087, p=0.044), TC (r=0.136, p=0.038), LDL (r=0.161, p=0.031), T2DM (r=-0.203, p=0.006)   were significantly correlated with PSA levels.  * Multiple linear regression:  - Age, TC, preDM and T2DM were independently and significantly correlated with PSA levels.  - Both models showed no significant influence in the FPG in PSA levels and HbA1c not entered into the analysis model. | 1. Many differences of anthropometry and biochemical indexes among different racial and ethnic groups.  2. A relatively small number of subjects. | Their results suggest preDM was an independent determinant of high PSA levels and support that men with T2DM had decreased PSA levels. |
| Naito M, et al., 2012(6) | Not differences | Not differences except for men ≥60 y. who presented significant inverse differences BMI- and age-adjusted as well as crude analysis. | Not considered | Not available | Not considered | Not considered (Mild cases of diabetes were likely to be included in the study population.) | There was no significant correlation between PSA and HbA1c (r= –0.006; p = 0.78) or FBG (r = –0.014; p = 0.51).  In age-stratified analysis, no significant differences of HbA1c or FBS levels were found between 35–59 years and 60 years or more (p = 0.313; p = 0.847) in diabetics. | 1. Proportionally fewer subjects in the diabetes group.  2. Mild cases of diabetes were likely to be included.  3. There were no data on the treatment duration and diagnosis period of diabetes.  4. Men with underlying prostate disease could have been included in this study. | Diabetes was associated with a reduction of PSA levels in the elderly |
| Wallner LP, et al., 2011(7) | Not reported | After adjusting for age, men with diabetes at baseline experienced less of an annual increase in serum PSA levels than did men without diabetes (1.11 vs 3.68%; p=0.02) | Type 2 diabetes | Results did not change after adjustment for baseline prostate volume (data not shown). | They hypothesize that as the duration of diabetes increases, the action of insulin decreases, resulting in subsequent drops in serum PSA levels. | Not considered | Not considered | 1. The baseline measures of diabetes does not account for changes in these conditions during follow-up.  2. Age at diagnosis of diabetes was not queried of men.  3. Self-report of the metabolic conditions, but diabetes diagnosis was validated among self-reported cases in a larger cohort study of diabetes in Olmsted County from 1950 to 2000 with a high concordance.  3. The long follow-up period lends itself to problems associated with attrition.  4. Because this is a Caucasian sample of men, generalizing these findings to other racial groups may not be appropriate. | Their results suggest that Caucasian men with T2DM experience smaller increases in serum PSA levels as they age compared to men without diabetes.  Additional research is needed to elucidate whether this difference results in a relatively lower incidence of PCa or less cancer detection among diabetic men. |
| Waters KM, et al., 2009(8) | Significant inverse difference | Significant inverse difference (Adjusted for BMI and age) | Not differentiated | Not considered | Not considered | Not considered | Not considered | 1. T2DM status was based on self-report.  2. The analysis does not account for incident cases of T2DM.  3. Diabetes and PCa are both traditionally underdiagnosed diseases.  4. Men who do not receive frequent medical care would be underdiagnosed and misclassiﬁed for both diseases. | They also confirmed results from previous studies, showing that PSA levels are decreased in diabetic men. Their findings that diabetic men are less likely to be screened for prostate cancer could not account for these results. |
| Müller H, et al., 2009(9) | Not reported | Adjusted for age: Significant inverse difference  Additionally, adjusted by BMI: Not differences | Not differentiated (only 2 participants reported diagnosis of diabetes below age 30y) | Not available | The PSA reduction was statistically significant in the group with a diabetes diagnosis in the last 5 years (-30%) compared to non-diabetics, but there was no difference for longer diabetes duration | Analysis by HbA1C level showed significant inverse differences. | Men with high HbA1c (6.1-6.9%) and very high HbA1c (≥7%) showed a significant PSA reduction (-16% and -30% respectively) compared with those with a normal HbA1C. | 1. No confirmation by biopsy that the participants are free of PCa.  2. No control of BPH.  3. BMI cannot differentiate between peripheral and central fat.  4. Duration of diabetes is a difficult to quantify parameter as T2DM may be undiagnosed in the population and known duration might be related to the degree of medical surveillance | The more severe forms of diabetes are associated with lower PSA levels and confirms the magnitude of reduction in PSA levels in diabetic men overall. The observed PSA reduction parallels reported risk reduction of PCa among diabetic men. |
| Fukui M, et al., 2008 (10) | Not differences | PSA levels were lower in diabetic men, except for men aged 40-49 y. | Type 2 diabetes | Not considered | Not considered | PSA levels did not differ according to the severity of diabetic  nephropathy or retinopathy (data  not shown). | Multiple regression analysis demonstrated that HbA1c were not independent determinants of serum PSA levels. | 1. They could not measure serum androgen concentrations in healthy subjects.  2. Only Japanese. | Serum PSA levels were lower in diabetic men compared with those in healthy men, which is in line with previous reports that patients with T2DM are at a decreased risk of PCa |
| Werny DM, et al., 2006(11) | Significant inverse difference in self-reporting group.  Not differences between diagnosed and undiagnosed diabetic. | Significant inverse difference (Controlling for age; median age, 51 years) | Not differentiated.  *Excluding the six persons who were diagnosed before age 30 y and were currently taking insulin did not significantly alter the results. | Not considered | The predicted PSA value was lowest in men who had been diagnosed with diabetes more than 10 years previously. | Not considered | Not considered | 1. Small number of men self-reporting with diabetes.  2. The number of participants with undiagnosed cancer was unknown.  3. Lack of clinical data.  4. Self- reported measures of diabetes status. | These results are consistent with the hypothesis that long-term diabetes is associated with a lower risk of PCa. The mechanism of this association may involve the regulation of PSA by androgens, although the authors are unable to confirm this assertion. |
| PSA: Prostate specific antigen; BMI: body mass index; HbA1C: Glycosylated haemoglobin; FBG: Fasting blood glucose; T2DM: type 2 diabetes mellitus; PCa: Prostate Cancer, TC: total cholesterol, LDL: low-density lipoprotein, preDM: prediabetes. | | | | | | | | | |

References:

1. Kobayashi M, Mizuno T, Yuki H, Kambara T, Betsunoh H, Nukui A, et al. Association between serum prostate-specific antigen level and diabetes, obesity, hypertension, and the laboratory parameters related to glucose tolerance, hepatic function, and lipid profile: implications for modification of prostate-specific antigen threshold. Int J Clin Oncol. 2020;25:472–8.

2. Ainahi A, Barakat A, Wakrim L, Mohammadi H, ElMdaghri N, Ezzikouri S. Prostate-specific Antigen Levels in Moroccan Diabetic Males: A Cross-sectional Study. Curr Diabetes Rev. 2018;14:286–90.

3. Al-Asadi J, Al-Naama L, Abdul-Kareem M, Mashkoor F. Serum level of prostate-specific antigen in diabetic patients in Basrah, Iraq. Niger Postgrad Med J. 2017;24:240.

4. Park JS, Lee KS, Ham WS, Chung BH, Koo KC. Impact of metformin on serum prostate-specific antigen levels. Medicine (Baltimore). 2017;96:e9427.

5. Sun A, Liu R, Sun G. Serum prostate-specific antigen levels in men with prediabetes: A cross-sectional study. Scand J Clin Lab Invest. 2015;75:273–81.

6. Naito M, Asai Y, Mori A, Fukada Y, Kuwabara M, Katase S, et al. Association of obesity and diabetes with serum prostate-specific antigen levels in Japanese males. Nagoya J Med Sci. 2012;74:285–92.

7. Wallner LP, Morgenstern H, McGree ME, Jacobson DJ, St Sauver JL, Jacobsen SJ, et al. The effects of type 2 diabetes and hypertension on changes in serum prostate specific antigen levels: results from the Olmsted County study. Urology. 2011;77:137–41.

8. Waters KM, Henderson BE, Stram DO, Wan P, Kolonel LN, Haiman CA. Association of diabetes with prostate cancer risk in the multiethnic cohort. Am J Epidemiol. 2009;169:937–45.

9. Muller H, Raum E, Rothenbacher D, Stegmaier C, Brenner H. Association of Diabetes and Body Mass Index with Levels of Prostate-Specific Antigen: Implications for Correction of Prostate-Specific Antigen Cutoff Values? Cancer Epidemiol Biomarkers Prev. 2009;18:1350–6.

10. Fukui M, Tanaka M, Kadono M, Imai S, Hasegawa G, Yoshikawa T, et al. Serum prostate-specific antigen levels in men with type 2 diabetes. Diabetes Care. 2008;31:930–1.

11. Werny DM, Saraiya M, Gregg EW. Prostate-specific Antigen Values in Diabetic and Nondiabetic US Men, 2001–2002. Am J Epidemiol. 2006;164:978–83.
